# Supplementary material for: Investigation of Radiation-Induced Toxicity in Head and Neck Cancer Patients through Radiomics and Machine Learning: A Systematic Review
Source: Hindawi journal article supplement (doi:10.1155/2021/5566508), 2021-06-09
Supplement: f1 [file 5566508.f1.pdf]

# Study

Leng X (2019) [8]  
 Scalco E (2013) [9]  
 Van Dijk VL (2018) [10]  
 Abdollahi H (2018) [11]  
 Thor M (2017) [12]  
 Van Dijk VL (2018) [13]  
 Pota M (2017) [14]  
 Gabrys et Al. [15]

|                         | 1 Image Protocol Quality | 2 Multiple segmentation | 3 Phantom study | 4 Tests-retests (imaging at multiple time-points) | 5 Features reduction or adjustment multiple testing | 6 Multivariate analyses with non radiomic features | 7 Biological correlates | 8 Cut-off analyses |
|-------------------------|--------------------------|-------------------------|-----------------|---------------------------------------------------|-----------------------------------------------------|----------------------------------------------------|-------------------------|--------------------|
| Leng X (2019) [8]       | 1                        |                         |                 | 1                                                 | 3                                                   |                                                    |                         | 1                  |
| Scalco E (2013) [9]     | 1                        |                         |                 | 1                                                 | -3                                                  |                                                    |                         | 1                  |
| Van Dijk VL (2018) [10] | 1                        |                         |                 |                                                   | 3                                                   | 1                                                  |                         | 1                  |
| Abdollahi H (2018) [11] | 1                        | 1                       |                 |                                                   | 3                                                   | 1                                                  |                         | 1                  |
| Thor M (2017) [12]      | 1                        |                         |                 |                                                   | -3                                                  | 1                                                  |                         | 1                  |
| Van Dijk VL (2018) [13] | 2                        |                         |                 |                                                   | 3                                                   | 1                                                  |                         | 1                  |
| Pota M (2017) [14]      | 1                        | 1                       |                 | 1                                                 | -3                                                  | 1                                                  |                         |                    |
| Gabrys et Al. [15]      |                          |                         |                 |                                                   | 3                                                   | 1                                                  |                         | 1                  |

| 9 Discrimination statistics | 10 Calibration statistics | 11 Prospective study | 12 Validation | 13 Comparison to gold standard | 14 Potential clinical utility | 15 Cost-effectiveness analyses | 16 Open science and data | Total score |
|-----------------------------|---------------------------|----------------------|---------------|--------------------------------|-------------------------------|--------------------------------|--------------------------|-------------|
| 2                           | 2                         |                      | -5            |                                |                               |                                |                          | 5           |
| 1                           |                           |                      | -5            |                                | 2                             |                                |                          | -2          |
| 2                           | 2                         |                      | 3             | 2                              | 2                             |                                |                          | 17          |
| 1                           | 2                         | 7                    | -5            |                                |                               |                                |                          | 12          |
| 2                           |                           |                      | -5            |                                | 2                             |                                | 2                        | 1           |
| 2                           | 2                         |                      | -5            | 2                              | 2                             |                                | 1                        | 11          |
|                             | 1                         |                      | 4             |                                | 2                             |                                | 1                        | 9           |
| 2                           | 2                         |                      | -5            | 2                              | 2                             |                                | 1                        | 9           |

| Study                   | 1 Image Protocol Quality | 2 Multiple segmentation | 3 Phantom study | 4 Tests-retests (imaging at multiple time-points) | 5 Features reduction or adjustment multiple testing | 6 Multivariate analyses with non radiomic features | 7 Biological correlates | 8 Cut-off analyses | 9 Discrimination statistics |
|-------------------------|--------------------------|-------------------------|-----------------|---------------------------------------------------|-----------------------------------------------------|----------------------------------------------------|-------------------------|--------------------|-----------------------------|
| Leng X (2019) [8]       | 1                        |                         |                 | 1                                                 | 3                                                   |                                                    |                         | 1                  | 2                           |
| Scalco E (2013) [9]     | 1                        |                         |                 | 1                                                 | -3                                                  |                                                    |                         | 1                  | 1                           |
| Van Dijk VL (2018) [10] | 1                        |                         | 1               |                                                   | 3                                                   | 1                                                  |                         | 1                  | 2                           |
| Abdollahi H (2018) [11] | 1                        | 1                       |                 |                                                   | 3                                                   | 1                                                  | 1                       | 1                  | 1                           |
| Thor M (2017) [12]      | 1                        |                         |                 |                                                   | -3                                                  | 1                                                  |                         | 1                  | 2                           |
| Van Dijk VL (2018) [13] | 1                        |                         |                 |                                                   | 3                                                   | 1                                                  |                         | 1                  | 2                           |
| Pota M (2017) [14]      | 1                        |                         |                 | 1                                                 | -3                                                  | 1                                                  |                         |                    |                             |
| Gabrys et Al. [15]      |                          |                         |                 |                                                   | 3                                                   | 1                                                  |                         | 1                  | 2                           |

| 10 Calibration statistics | 11 Prospective study | 12 Validation | 13 Comparison to gold standard | 14 Potential clinical utility | 15 Cost-effectiveness analyses | 16 Open science and data | Total score |
|---------------------------|----------------------|---------------|--------------------------------|-------------------------------|--------------------------------|--------------------------|-------------|
| 2                         | 7                    | -5            |                                |                               |                                |                          | 12          |
|                           |                      | -5            |                                | 2                             |                                |                          | -2          |
| 2                         |                      | 3             | 2                              | 2                             |                                |                          | 18          |
| 2                         |                      | -5            | 2                              | 2                             |                                |                          | 10          |
|                           |                      | -5            |                                | 2                             |                                | 2                        | 1           |
| 2                         |                      | -5            | 2                              | 2                             |                                | 1                        | 10          |
| 1                         |                      | 4             |                                | 2                             |                                |                          | 7           |
| 2                         |                      | -5            | 2                              | 2                             |                                | 1                        | 9           |

| Study                   | Image Protocol Quality | Multiple segmentation | Phantom study | Tests-retests (imaging at multiple time-points) | Features reduction or ajustement multiple testing | Multivariate analyses with non radiomic features | Biological correlates | Cut-off analyses | Discrimination statistics |
|-------------------------|------------------------|-----------------------|---------------|-------------------------------------------------|---------------------------------------------------|--------------------------------------------------|-----------------------|------------------|---------------------------|
| Leng X (2019) [8]       | 1                      |                       |               | 1                                               | 3                                                 |                                                  |                       | 1                | 2                         |
| Scalco E (2013) [9]     | 1                      | 1                     |               | 1                                               | -3                                                |                                                  |                       | 1                | 1                         |
| Van Dijk VL (2018) [10] | 1                      |                       | 1             |                                                 | 3                                                 | 1                                                |                       | 1                | 2                         |
| Abdollahi H (2018) [11] | 1                      | 1                     |               |                                                 | 3                                                 | 1                                                |                       | 1                | 2                         |
| Thor M (2017) [12]      | 1                      |                       |               |                                                 | -3                                                |                                                  |                       | 1                | 2                         |
| Van Dijk VL (2018) [13] | 1                      |                       |               |                                                 | 3                                                 | 1                                                |                       | 1                | 2                         |
| Pota M (2017) [14]      | 1                      | 1                     |               | 1                                               | -3                                                | 1                                                |                       |                  |                           |
| Gabrys et Al. [15]      |                        |                       |               |                                                 | 3                                                 | 1                                                |                       | 1                | 2                         |

| Calibration statistics | Prospective study | Validation | Comparison to gold standard | Potential clinical utility | Cost-effectiveness analyses | Open science and data | Total score |
|------------------------|-------------------|------------|-----------------------------|----------------------------|-----------------------------|-----------------------|-------------|
| 1                      |                   | -5         | 2                           |                            |                             | 2                     | 8           |
| 1                      |                   | -5         | 2                           |                            |                             | 2                     | 2           |
| 2                      |                   | 3          | 2                           |                            |                             | 2                     | 18          |
| 1                      |                   | -5         |                             |                            |                             | 2                     | 7           |
|                        |                   | -5         |                             |                            |                             | 2                     | -2          |
| 2                      |                   | -5         | 2                           |                            |                             | 2                     | 9           |
| 1                      |                   | -5         |                             |                            |                             |                       | -3          |
| 2                      |                   | -5         | 2                           |                            |                             | 2                     | 8           |

## 1 Image Protocol Quality

Voters for each subject 3

Total votes 24

nij=votes

Allowable values

|           |   | 0 | 1  | 2 |
|-----------|---|---|----|---|
| subjects  | 1 | 0 | 3  | 0 |
| evaluated | 2 | 0 | 3  | 0 |
| 8         | 3 | 0 | 3  | 0 |
|           | 4 | 0 | 3  | 0 |
|           | 5 | 0 | 3  | 0 |
|           | 6 | 0 | 2  | 1 |
|           | 7 | 0 | 3  | 0 |
|           | 8 | 3 | 0  | 0 |
| Total     |   | 3 | 20 | 1 |

0 9  
0 9  
0 9  
0 9  
0 9  
0 4  
0 9  
9 0

pj 0,125 0,833 0,042  
pj squared 0,016 0,694 0,002

Pe medium  
0,7118056

Fleiss kappa per 1 Image Protocol Quality

k= 0,7108434

Poor  
< 0 agreement  
Slight  
0.01 – 0.20 agreement  
Fair  
0.21 – 0.40 agreement  
Moderate  
0.41 – 0.60 agreement  
Substantial  
0.61 – 0.80 agreement  
Almost  
perfect  
0.81 – 1.00 agreement

P medium  
0,91666667

Pi

|   |            |
|---|------------|
| 0 | 1          |
| 0 | 1          |
| 0 | 1          |
| 0 | 1          |
| 0 | 1          |
| 1 | 0,33333333 |
| 0 | 1          |
| 0 | 1          |



## 2 Multiple segmentation

Voters for each subject 3

Total votes 24

nij=votes

Allowable values

|           |   | 0  | 1 |   |
|-----------|---|----|---|---|
| subjects  | 1 | 3  | 0 |   |
| evaluated | 2 | 2  | 1 |   |
| 8         | 3 | 3  | 0 |   |
|           | 4 | 0  | 3 |   |
|           | 5 | 3  | 0 |   |
|           | 6 | 3  | 0 |   |
|           | 7 | 1  | 2 |   |
|           | 8 | 3  | 0 |   |
| Total     |   | 18 | 6 | 0 |

9 0  
4 1  
9 0  
0 9  
9 0  
9 0  
1 4  
9 0

pj 0,75 0,25 0  
pj squared 0,563 0,063 0

Pe medium  
0,625

Fleiss kappa per 2 Multiple segmentation

k= 0,5555556

|             |             |
|-------------|-------------|
|             | Poor        |
| < 0         | agreement   |
|             | Slight      |
| 0.01 – 0.20 | agreement   |
|             | Fair        |
| 0.21 – 0.40 | agreement   |
|             | Moderate    |
| 0.41 – 0.60 | agreement   |
|             | Substantial |
| 0.61 – 0.80 | agreement   |
|             | Almost      |
|             | perfect     |
| 0.81 – 1.00 | agreement   |

P medium  
0,833333333

Pi

|   |             |
|---|-------------|
| 0 | 1           |
| 0 | 0,333333333 |
| 0 | 1           |
| 0 | 1           |
| 0 | 1           |
| 0 | 1           |
| 0 | 0,333333333 |
| 0 | 1           |

### 3 Phantom study

Voters for each subject 3

Total votes 24

nij=voti

Allowable values

|           |   | 0  | 1 |   |
|-----------|---|----|---|---|
| subjects  | 1 | 3  | 0 |   |
| evaluated | 2 | 3  | 0 |   |
| 8         | 3 | 1  | 2 |   |
|           | 4 | 3  | 0 |   |
|           | 5 | 3  | 0 |   |
|           | 6 | 3  | 0 |   |
|           | 7 | 3  | 0 |   |
|           | 8 | 3  | 0 |   |
| Total     |   | 22 | 2 | 0 |

9 0  
9 0  
1 4  
9 0  
9 0  
9 0  
9 0  
9 0  
9 0

pj 0,917 0,083 0  
pj squared 0,84 0,007 0

Pe medium  
0,8472222

Fleiss kappa per 3 Phantom study

k= 0,4545455

< 0 Poor agreement  
Slight  
0.01 – 0.20 agreement  
Fair  
0.21 – 0.40 agreement  
Moderate  
0.41 – 0.60 agreement  
Substantial  
0.61 – 0.80 agreement  
Almost perfect  
0.81 – 1.00 agreement

P medium  
0,91666667

Pi

|   |            |
|---|------------|
| 0 | 1          |
| 0 | 1          |
| 0 | 0,33333333 |
| 0 | 1          |
| 0 | 1          |
| 0 | 1          |
| 0 | 1          |
| 0 | 1          |

| Study                   | 1 Image Protocol Quality | 2 Multiple segmentation | 3 Phantom study | 4 Tests-retests (imaging at multiple time-points) | 5 Features reduction or ajustement multiple testing | 6 Multivariate analyses with non radiomic features | 7 Biological correlates | 8 Cut-off analyses | 9 Discrimination statistics | 10 Calibration statistics | 11 Prospective study | 12 Validation |
|-------------------------|--------------------------|-------------------------|-----------------|---------------------------------------------------|-----------------------------------------------------|----------------------------------------------------|-------------------------|--------------------|-----------------------------|---------------------------|----------------------|---------------|
| Leng X (2019) [15]      | 1                        | 0                       | 0               | 1                                                 | 3                                                   | 0                                                  | 0                       | 1                  | 2                           | 2                         | 0                    | -5            |
| Scalco E (2013) [17]    | 1                        | 0                       | 0               | 1                                                 | -3                                                  | 0                                                  | 0                       | 1                  | 1                           | 0                         | 0                    | -5            |
| Van Dijk VL (2018) [11] | 1                        | 0                       | 1               | 0                                                 | 3                                                   | 1                                                  | 0                       | 1                  | 2                           | 2                         | 0                    | 3             |
| Abdollahi H (2018) [12] | 1                        | 1                       | 0               | 0                                                 | 3                                                   | 1                                                  | 0                       | 1                  | 1                           | 2                         | 0                    | -5            |
| Thor M (2017) [19]      | 1                        | 0                       | 0               | 0                                                 | -3                                                  | 1                                                  | 0                       | 1                  | 2                           | 0                         | 0                    | -5            |
| Van Dijk VL (2018) [13] | 1                        | 0                       | 0               | 0                                                 | 3                                                   | 1                                                  | 0                       | 1                  | 2                           | 2                         | 0                    | -5            |
| Pota M (2017) [16]      | 1                        | 1                       | 0               | 1                                                 | -3                                                  | 1                                                  | 0                       | 0                  | 0                           | 1                         | 0                    | 4             |
| Gabrys HS [14]          | 0                        | 0                       | 0               | 0                                                 | 3                                                   | 1                                                  | 0                       | 1                  | 2                           | 2                         | 0                    | -5            |

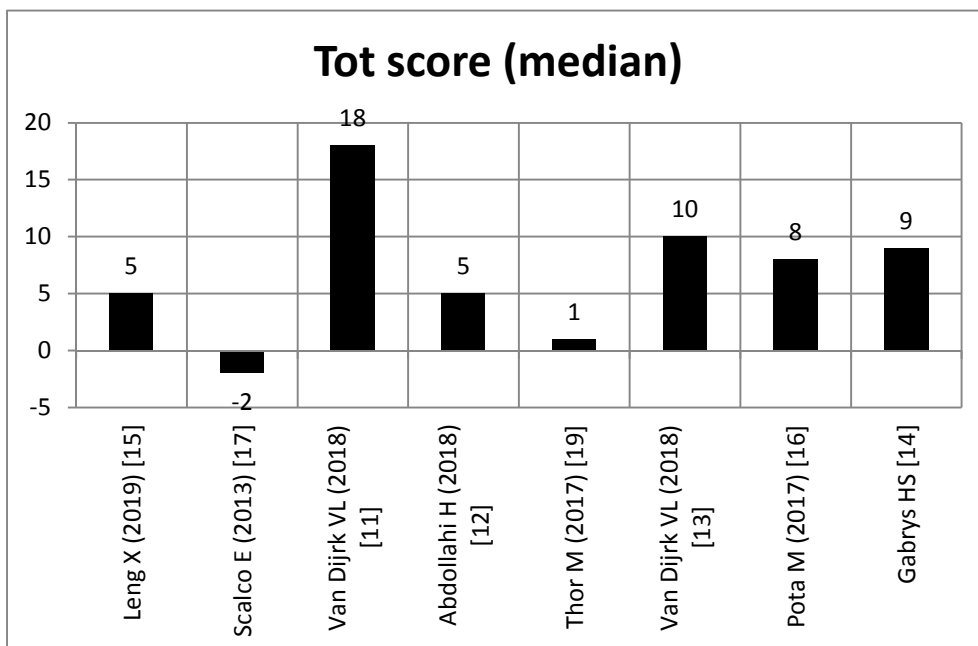

|   |   |   |    |                             |    |
|---|---|---|----|-----------------------------|----|
| 2 | 0 | 0 | 13 | Comparison to gold standard |    |
| 0 | 2 | 0 | 14 | Potential clinical utility  |    |
| 2 | 2 | 0 | 15 | Cost-effectiveness analyses |    |
| 0 | 0 | 0 | 16 | Open science and data       |    |
| 0 | 2 | 0 |    | Tot score                   | 5  |
| 2 | 2 | 0 |    |                             | -2 |
| 0 | 2 | 0 |    |                             | 18 |
| 2 | 2 | 0 |    |                             | 5  |
| 0 | 2 | 0 |    |                             | 1  |
| 2 | 2 | 0 |    |                             | 10 |
| 0 | 2 | 0 |    |                             | 8  |
| 2 | 2 | 0 |    |                             | 9  |

| Study                   | 1 Image Protocol Quality | 2 Multiple segmentation | 3 Phantom study | 4 Tests-retests (imaging at multiple time-points) | 5 Features reduction or ajustement multiple testing | 6 Multivariate analyses with non radiomic features | 7 Biological correlates | 8 Cut-off analyses | 9 Discrimination statistics | 10 Calibration statistics | 11 Prospective study | 12 Validation |
|-------------------------|--------------------------|-------------------------|-----------------|---------------------------------------------------|-----------------------------------------------------|----------------------------------------------------|-------------------------|--------------------|-----------------------------|---------------------------|----------------------|---------------|
| Leng X (2019) [15]      | 1                        | 0                       | 0               | 1                                                 | 3                                                   | 0                                                  | 0                       | 1                  | 2                           | 1,67                      | 2,33                 | -5            |
| Scalco E (2013) [17]    | 1                        | 0,3333                  | 0               | 1                                                 | -3                                                  | 0                                                  | 0                       | 1                  | 1                           | 0,33                      | 0                    | -5            |
| Van Dijk VL (2018) [11] | 1                        | 0                       | 0,67            | 0                                                 | 3                                                   | 1                                                  | 0                       | 1                  | 2                           | 2                         | 0                    | 3             |
| Abdollahi H (2018) [12] | 1                        | 1                       | 0               | 0                                                 | 3                                                   | 1                                                  | 0,33                    | 1                  | 1,33                        | 1,67                      | 2,33                 | -5            |
| Thor M (2017) [19]      | 1                        | 0                       | 0               | 0                                                 | -3                                                  | 0,67                                               | 0                       | 1                  | 2                           | 0                         | 0                    | -5            |
| Van Dijk VL (2018) [13] | 1,33                     | 0                       | 0               | 0                                                 | 3                                                   | 1                                                  | 0                       | 1                  | 2                           | 2                         | 0                    | -5            |
| Pota M (2017) [16]      | 1                        | 0,6667                  | 0               | 1                                                 | -3                                                  | 1                                                  | 0                       | 0                  | 0                           | 1                         | 0                    | 1             |
| Gabrys HS [14]          | 0                        | 0                       | 0               | 0                                                 | 3                                                   | 1                                                  | 0                       | 1                  | 2                           | 2                         | 0                    | -5            |

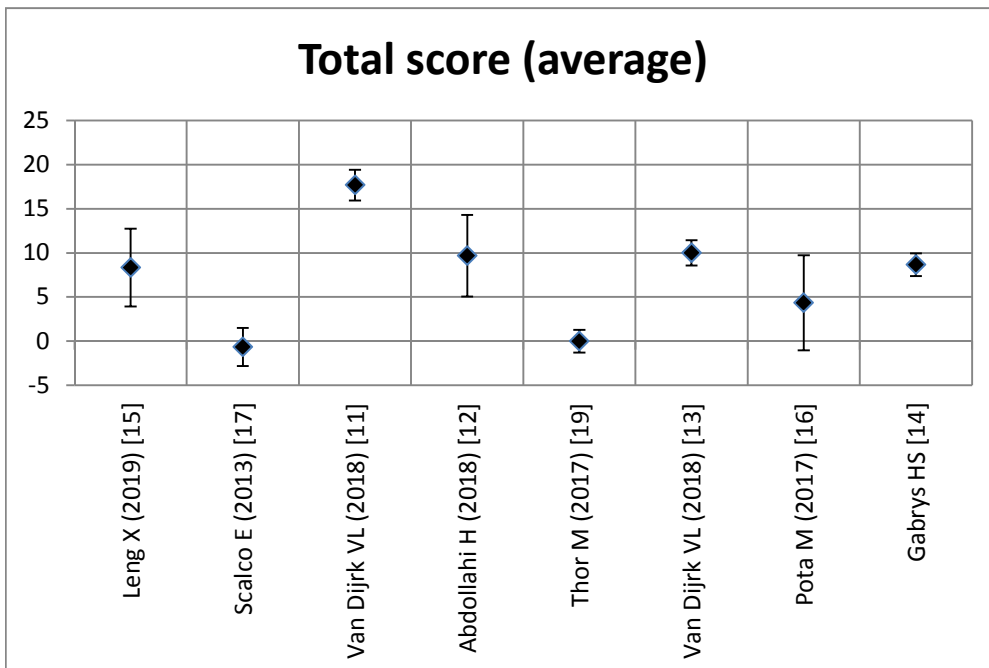

| 13 Comparison to gold standard | 14 Potential clinical utility | 15 Cost-effectiveness analyses | 16 Open science and data | Tot score | sd on total |
|--------------------------------|-------------------------------|--------------------------------|--------------------------|-----------|-------------|
| 0,67                           | 0                             | 0                              | 0,67                     | 8         | 4           |
| 0,67                           | 1,33                          | 0                              | 0,67                     | -1        | 2           |
| 2                              | 1,33                          | 0                              | 0,67                     | 18        | 2           |
| 0,67                           | 0,67                          | 0                              | 0,67                     | 10        | 5           |
| 0                              | 1,33                          | 0                              | 2                        | 0         | 1           |
| 2                              | 1,33                          | 0                              | 1,33                     | 10        | 1           |
| 0                              | 1,33                          | 0                              | 0,33                     | 4         | 5           |
| 2                              | 1,33                          | 0                              | 1,33                     | 9         | 1           |
